# Supplementary material for: Impaired Anti-Tumor T cell Response in Hepatocellular Carcinoma
Source: MDPI journal article supplement (doi:10.3390/cancers12030627), 2020-03-08
Supplement: s1 [file s1]

Supplementary Figure B

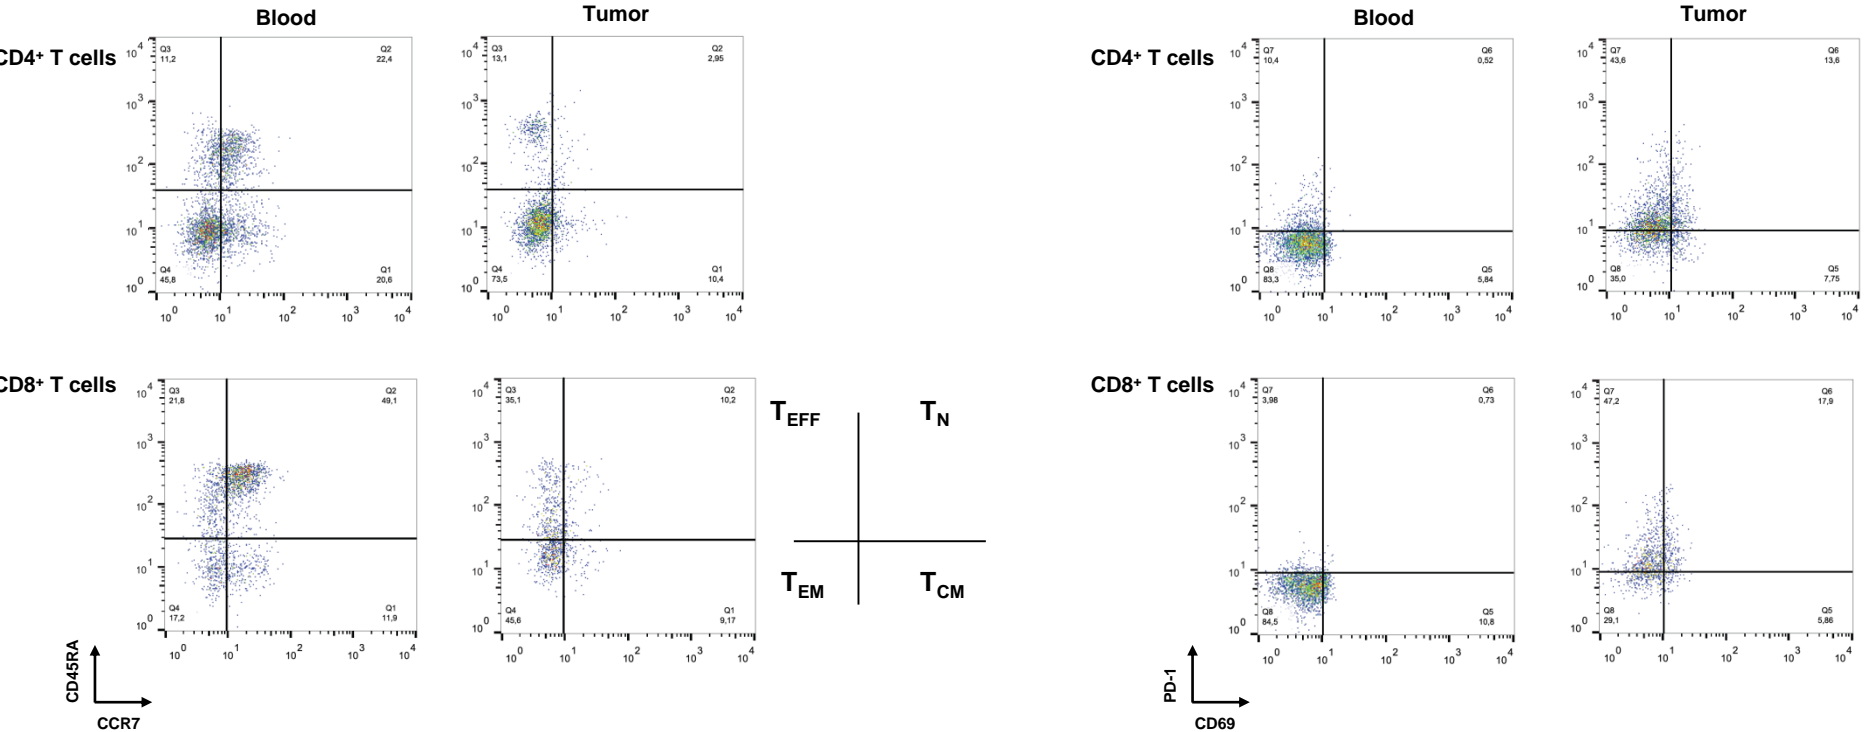

Cell suspensions were prepared from PBMC, tumor and peritumor, from HCC patients and were analyzed by flow cytometry. The PBMC from healthy donors were used as control.

Left panels: CCR7 and CD45RA staining were used to distinguish the Naïve (T<sub>N</sub>), central memory (T<sub>CM</sub>), effector memory (T<sub>EM</sub>) and effector cell (T<sub>EFF</sub>) subsets within CD4<sup>+</sup> T cells and CD8<sup>+</sup> T cells. One representative dot plot per subset is shown for PBMC and for tumor of one patient.

Right panels: CD69 and PD-1 staining were analyzed on CD4<sup>+</sup> and CD8<sup>+</sup> T cells. One representative dot plot is shown for each subset in PBMC and tumor of an HCC patient.
