# Supplementary figures and images for: Impaired Anti-Tumor T cell Response in Hepatocellular Carcinoma
Source: MDPI journal article supplement (doi:10.3390/cancers12030627), 2020-03-08

Supplementary Figure A: Gating strategy

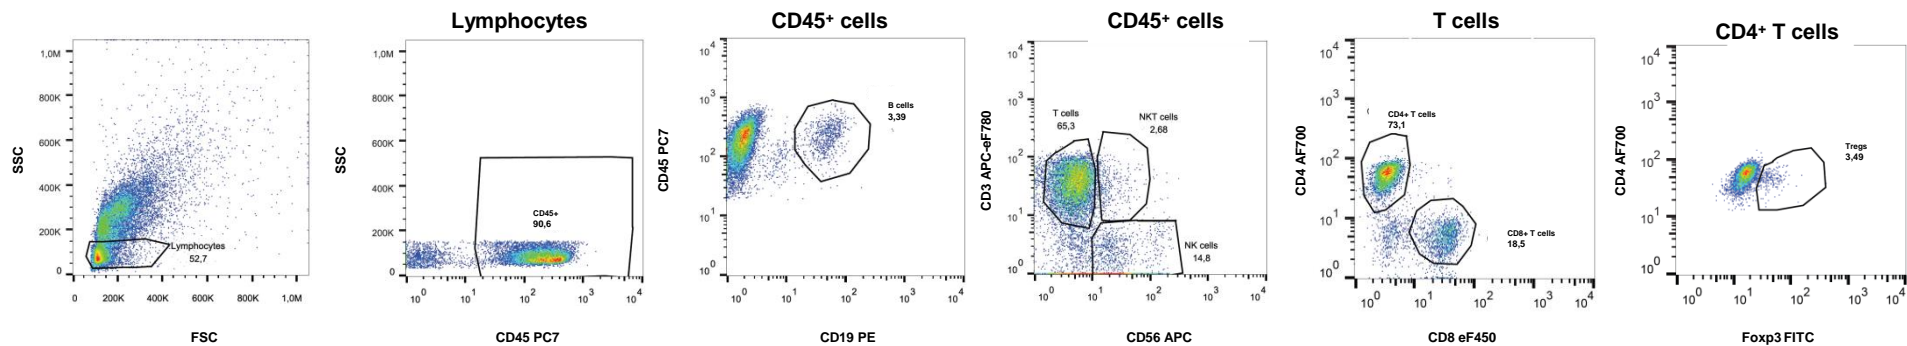

Supplement: s1 [file s1]
